1  
2  
3 Heritability and relationship of oxytocin receptor gene variants with social behavior and  
4 central oxytocin in colony-reared adult female rhesus macaques

5  
6  
7 Desirée De Leon<sup>1,2,3</sup>, Hasse Walum<sup>2</sup>, Kai M. McCormack<sup>1,4</sup>, Jamie L. LaPrairie<sup>1,2,3</sup>, Stephen G.  
8 Lindell<sup>5</sup>, Ashley Firesryche<sup>5</sup>, Zach Johnson<sup>1,6</sup>, Mark E. Wilson<sup>1,7</sup>, Christina S. Barr<sup>5</sup>, Mar M.  
9 Sanchez<sup>1,2,3,7</sup>, Larry J. Young<sup>1,2,3,7\*</sup>

10

11

12 <sup>1</sup> Yerkes National Primate Research Center, Emory University, Atlanta, GA, USA

13 <sup>2</sup> Silvio O. Conte Center for Oxytocin and Social Cognition, Emory University, Atlanta, GA, USA

14 <sup>3</sup> Center for Translational Social Neuroscience, Emory University, Atlanta, GA, USA

15 <sup>4</sup> Department of Psychology, Spelman College, Atlanta, GA, USA

16 <sup>5</sup> Laboratory of Comparative Behavioral Genomics, NIH/NIAAA, Rockville, MD, USA

17 <sup>6</sup> Illumina Corporation, San Diego, CA, USA

18 <sup>7</sup> Department of Psychiatry & Behavioral Sciences, Emory School of Medicine, Emory  
19 University, Atlanta, GA, USA

20

21 \* Corresponding author

22 E-mail: [lyoun03@emory.edu](mailto:lyoun03@emory.edu)

23

24

## 26 **Abstract**

27           The genetic contributions to sociality are an important research focus for understanding  
28 individual variation in social function and risk of social deficits in neurodevelopmental disorders  
29 (e.g. autism). The neuropeptide oxytocin (OXT) and its receptor, OXTR, influence social  
30 behavior across species. In humans and animals, common variants within the OXTR gene  
31 (*OXTR*) have been associated with varying socio-behavioral traits. However, the reported  
32 magnitude of influence of individual variants on complex behavior has been inconsistent.  
33 Compared to human studies, non-human primate (NHP) studies in controlled environments  
34 have the potential to result in robust effects detectable in relatively small samples. Here we  
35 estimate heritability of social behavior and central OXT concentrations in 214 socially-housed  
36 adult female rhesus macaques, a species sharing high similarity with humans in genetics,  
37 physiology, brain and social complexity. We present a bioinformatically-informed approach for  
38 identifying single nucleotide polymorphisms (SNPs) with likely biological relevance. We tested  
39 13 common SNPs in regulatory and coding regions of *OXTR* for associations with behavior (pro-  
40 social, anxiety-like, and aggressive) and OXT concentration in cerebrospinal fluid (CSF). We  
41 found moderate rates of heritability for both social behavior and CSF OXT concentrations. No  
42 tested SNPs showed significant associations with behaviors or CSF in this sample. Associations  
43 between OXT CSF and social behavior were not significant either. SNP effect sizes were  
44 generally comparable to those reported in human studies of complex traits. While environmental  
45 control and a socio-biological similarity with humans is an advantage of rhesus models for  
46 detecting smaller genetic effects, it is insufficient to obviate large sample sizes necessary for  
47 appropriate statistical power.

48

## 49 **Introduction**

50 Oxytocin is an evolutionarily conserved neuropeptide involved in orchestrating  
51 reproductive, maternal, and social behaviors across species [1]. Individual variability in these  
52 traits is attributable to genetic variation, apart from the role of experience. As such, variants  
53 such as single nucleotide polymorphisms (SNPs) within the OXT receptor gene (*OXTR*) may  
54 contribute to the diversity of complex social repertoires. Genetic association studies suggest  
55 that variation in *OXTR* may explain part of the variance in social phenotypes including pair-  
56 bonding behavior, social recognition, prosocial temperament, and sensitivity to social stressors  
57 [1–3]. Multiple *OXTR* SNPs have also been linked to social impairments in individuals with  
58 autism [4].

59  
60 Despite reports linking human *OXTR* variants to social phenotypes, other studies,  
61 including a meta-analysis [5], have failed to find effects of consistent magnitude and direction of  
62 these variants on social domains [see 6 for review]. Inconsistent results may be related to  
63 biases which disproportionately suppress non-significant results from publication (e.g.  
64 publication bias, selective reporting), and inflated effect sizes due to low statistical power [7].

65  
66 The use of animal models, however, has allowed the underlying mechanisms for SNP-  
67 behavior associations to be probed in the brain, including assessing the functional effects of  
68 differential *OXTR* gene expression caused by genetic variants in brain tissue. For example, in  
69 the prairie vole rodent model, a single *Oxtr* SNP predicted more than 70% of the variability in  
70 expression in the nucleus accumbens, a region critical for social reward [8]. This suggests that  
71 individual variants have the potential to profoundly impact brain phenotypes which can mediate  
72 downstream behavior differences.

73

74 Non-human primates (NHPs), such as the rhesus macaque, have been widely used to  
75 study social behavior. Both rhesus and humans display rich behavioral repertoires, complex  
76 social hierarchies, and are very similar in their physiology and neuroanatomy. Additionally,  
77 rhesus have frequently been used to investigate the role of OXT on sociality [9], and as such, an  
78 understanding of the genetic contributions to the oxytocinergic system in this NHP model is  
79 valuable for translation to humans.

80

81 While human genetic association studies necessitate extremely large samples to detect  
82 small effects reliably among the multitude of factors influencing complex traits, it is possible that  
83 NHP studies conducted in experimentally controlled, semi-naturalistic settings with known  
84 pedigrees can detect larger effects due to the reduction in environmental noise (e.g. standard  
85 diets and perinatal environments). The goal of the present study was to use an informed  
86 approach to examine the associations of novel rhesus *OXTR* (*rhOXTR*) SNPs with social  
87 behavior (pro-social, anxiety-like, and aggressive) and OXT in cerebrospinal fluid (CSF) in 214  
88 adult female rhesus macaques housed in large social groups. We also report estimates of  
89 heritability and examine the effects of OXT CSF on each behavior.

90

## 91 **Materials and methods**

### 92 **Subjects and housing**

93 Subjects were 214 adult female rhesus monkeys (4-24 years in age; median: 7,  
94 interquartile range: 6-11) of known pedigrees living in complex social groups at the Yerkes  
95 National Primate Research Center (YNPRC) Field Station (Lawrenceville, GA) as described in  
96 [10]. Subjects came from five social groups consisting of 28-94 adult females, their kin, and 2-10  
97 adult males. Animals were selected from matrilineal lines across all social status ranks (high, medium

98 and low) and with varying degrees of relatedness for heritability analyses. Animals were housed  
99 in outdoor enclosures (3/4 to 1 acre areas) with access to climate-controlled indoor facilities and  
100 provided a standard commercial low-fat, high-fiber diet (Purina Mills International, LabDiets, St.  
101 Louis, MO) and water *ad libitum*, supplemented with seasonal fruits or vegetables twice per day.  
102 All procedures complied with the Animal Welfare Act and U.S. DHHS “Guide for the Care and  
103 Use of Laboratory Animals” and were approved by the Emory IACUC.

104

## 105 Behavioral data collection

106 Focal observations were collected in real-time following published protocols [10,11]  
107 based on established ethograms (Altmann, 1962). An average behavioral observation of 80  
108 min/animal was collected during the mating season to reduce seasonal variability in behavior.  
109 We focused on representative behaviors: pro-social (percent of time spent in proximity to other  
110 adult females), anxiety-like (frequency of self-scratches) [12], and aggressive (non-contact,  
111 subject-initiated) behaviors (Table 1).

112

113 **Table 1. Specific behaviors analyzed for this study**

| Variable                                       | Definition                                                                               | Data Collected |
|------------------------------------------------|------------------------------------------------------------------------------------------|----------------|
| <b><i>Pro-social Behavior</i></b>              |                                                                                          |                |
| Proximity to other adult females <sup>a</sup>  | Subject is within 1 foot of one or more other adult females (including physical contact) | Duration       |
| <b><i>Aggressive Behavior</i></b>              |                                                                                          |                |
| Non-contact aggression                         | Counts of agonistic chases, open-mouth threats, barks, and lunges of/by another animal   | Frequency      |
| <b><i>Anxiety-like / Solitary Behavior</i></b> |                                                                                          |                |
| Anxiety/self-directed                          | Counts of self-scratches <sup>b</sup>                                                    | Frequency      |

114 <sup>a</sup> Given the matrilineal structure of rhesus troops [19], proximity to adult females (as opposed to other  
115 members in the group) comprise the most frequent and relevant social interaction observed

116 <sup>b</sup> In order for the same frequency behavior to be scored a second time, at least 3 seconds had to have  
117 passed from the first instance of the behavior

118

## 119 **CSF and blood samples**

120           Animals were habituated to experimental procedures to facilitate blood and CSF  
121 collection using methods minimizing arousal [10]. Each subject was accessed once, shortly after  
122 sunrise and during mating season, but never on the same day as the behavioral data collection.  
123 Animals were anesthetized with Telazol (3 mg/kg, IM). CSF samples were collected in a subset  
124 of the subjects (n=166) to examine central OXT concentrations. CSF samples were collected (2  
125 ml/subject) from the *cisterna magna* by gravity through a 22 G needle and placed immediately  
126 on dry ice. Two 3 ml blood samples were collected in EDTA tubes for DNA extraction and  
127 immediately placed on ice. Samples were stored at -80°C until time of processing. CSF samples  
128 were processed by the YNPRC Biomarkers Core Laboratory using commercially available  
129 ELISA kits produced by Assay Designs (Ann Arbor, MI), following manufacturer's  
130 recommendations. Sensitivity of the OXT assay was 15.6 pg/ml and the inter- and intra- assay  
131 CVs were 7.48% and 10.2%, respectively.

132

## 133 **Covariates**

134           Social rank and age (and no other variables) were included as covariates for all models.  
135 OXT concentrations were assayed in three batches; observations were mean-centered per  
136 batch to control for inter-batch variation.

137

## 138 **SNP selection**

139           SNP discovery efforts were completed in a separate group of rhesus and focused on 5'  
140 regulatory and coding regions of *rhOXTR*. Within these regions, candidate SNPs were identified  
141 in positions analogous to those in humans that have been cited as being involved in *OXTR*

142 expression [13] or suggested to predict individual differences in behavior and disease  
143 vulnerability. While SNPs are not conserved across species, comparably located SNPs in  
144 macaques may confer functionally similar effects and therefore provide translational potential.  
145 Additional SNPs in highly conserved areas within the region of interest were also included as  
146 candidates. Candidates were narrowed down based on their presence with sufficient minor  
147 allele frequency in that separate group of macaques, comprising representatives from multiple  
148 genetically-distinct populations. This resulted in 13 loci to be genotyped for this study's sample  
149 (Fig 1).

150  
151 **Fig 1. Schematic of *OXTR* SNPs probed in this study.** Untranslated portions of the exons are  
152 indicated by the white bars. Genomic coordinates correspond to chromosome 3 of the MacaM  
153 reference genome (SNP 1) 140481032, (SNP 2) 140497572, (SNP 3) 140497358, (SNP 4)  
154 140497003, (SNP 5) 140496605, (SNP 6) 140496348, (SNP 7) 140496344, (SNP 8)  
155 140496196, (SNP 9) 140495645, (SNP 10) 140495542, (SNP 11) 140495303, (SNP 12)  
156 140495244 G/A, (SNP 13) 140495203.

157

## 158 **Genotyping**

159 Three different genotyping techniques were used. Archived next-generation sequencing  
160 data targeting *OXTR* exons was available for loci 4-13. Libraries were generated using the  
161 Illumina NexteraXT DNA kit and sequenced on an Illumina HiSeq1000. The remaining markers  
162 were genotyped using TaqMan or Sanger Sequencing. Cycle sequencing was performed using  
163 the Big Dye Terminator, version 3.1, reaction in 96-well optical plates (Applied Biosystems,  
164 Foster City, California). Variants were detected by visualization of electropherograms generated  
165 by ABI Sequencing Analysis software. Relevant assay and primer information are in  
166 Supplemental Table S1.

167

## 168 **Statistical analysis**

169 All statistical analyses were performed in R version 3.4.1 (R Project for Statistical  
170 Computing, Vienna, Austria). Associations of SNPs with behavioral and CSF measures, as well  
171 as heritability, were examined using the "animal model" with the "MCMCglmm" package [14].  
172 Narrow-sense heritability was calculated as the proportion of variance explained by additive  
173 genetic factors (via the pedigree) out of all phenotypic variance. SNPs and covariates were  
174 included as fixed effects, and relatedness was accounted for by including pedigree as a random  
175 effect. To account for differences in total time observed, observation length was included as an  
176 offset for models including frequency behaviors (i.e. raw counts). The prior distribution for  
177 additive genetic variance ( $\sigma^2_A$ ) was defined by commonly used non-informative parameters for  
178 the inverse-gamma distribution, IG(0.001, 0.001). Models were run with a minimum of 5 million  
179 iterations, a burn-in of 5,000, and thinning interval of 1,000 until adequate mixing was ensured.

180

181 A Gaussian distribution was specified for pro-social behavior and log-transformed OXT  
182 CSF measures. For anxiety-like behavior, a Poisson specification was used. Heritability was not  
183 estimable for aggression, even after trying multiple distributions and stronger priors on  $\sigma^2_A$ . This  
184 was most likely due to a combination of low occurrence of this behavior (i.e. low information)  
185 and a small sample size [15]. Because controlling for relatedness was essential for all models,  
186 this outcome was excluded from subsequent analyses.

187

188 In post-hoc analyses, a likelihood-ratio test was used to compare whether inclusion of all  
189 SNPs (versus none) significantly improved model fit. To do so, frequentist versions of each



190 model were run using R packages “pedigreemm” and “regress” to extract maximum log-  
191 likelihood values.

192

## 193 **Results**

### 194 **Heritability estimates**

195 We report moderate heritability for pro-social behavior ( $h^2 = 0.312$ ), anxiety-like behavior  
196 ( $h^2 = 0.283$ ), and OXT CSF ( $h^2 = 0.183$ ), though all 95% credible intervals were wide (Table 2).

197

198

199 **Table 2. Heritability and SNP estimates**

200

| Narrow sense heritability ( $h^2$ ) | Proximity to Adult Females (Pro-social) |              |              | Self-Scratches (Anxiety-like) |                       |              | OXT in CSF     |                       |              |
|-------------------------------------|-----------------------------------------|--------------|--------------|-------------------------------|-----------------------|--------------|----------------|-----------------------|--------------|
|                                     | Point Estimate                          | Lower 95% CI | Upper 95% CI | Point Estimate                | Lower 95% CI          | Upper 95% CI | Point Estimate | Lower 95% CI          | Upper 95% CI |
| Without fixed effects               | 0.312                                   | 0.046        | 0.591        | 0.213                         | $4.98 \times 10^{-4}$ | 0.670        | 0.183          | 0.002                 | 0.478        |
| With fixed effects                  | 0.306                                   | 0.038        | 0.587        | 0.297                         | $3.95 \times 10^{-4}$ | 0.679        | 0.193          | $7.93 \times 10^{-4}$ | 0.500        |
| SNPs                                | $\beta$                                 | Lower 95% CI | Upper 95% CI | $\beta$                       | Lower 95% CI          | Upper 95% CI | $\beta$        | Lower 95% CI          | Upper 95% CI |
| 1) 140481032 G/A                    | -0.011                                  | -0.043       | 0.023        | 0.003                         | -0.141                | 0.148        | 0.039          | -0.056                | 0.136        |
| 2) 140497572 G/C                    | 0.003                                   | -0.028       | 0.037        | 0.058                         | -0.089                | 0.224        | 0.023          | -0.072                | 0.123        |
| 3) 140497358 G/A                    | 0.003                                   | -0.028       | 0.038        | 0.079                         | -0.076                | 0.238        | 0.025          | -0.074                | 0.122        |
| 4) 140497003 G/T                    | -0.037                                  | -0.132       | 0.063        | -0.481                        | -0.912                | 0.015        | 0.123          | -0.177                | 0.431        |
| 5) 140496605 T/C                    | -0.006                                  | -0.038       | 0.027        | 0.043                         | -0.126                | 0.19         | 0.015          | -0.073                | 0.108        |
| 6) 140496348 A/G                    | -0.004                                  | -0.038       | 0.027        | 0.031                         | -0.111                | 0.188        | 0.019          | -0.073                | 0.108        |
| 7) 140496344 A/C                    | -0.005                                  | -0.038       | 0.028        | 0.032                         | -0.126                | 0.181        | 0.018          | -0.076                | 0.115        |
| 8) 140496196 G/T                    | 0.014                                   | -0.026       | 0.049        | 0.043                         | -0.128                | 0.22         | -0.032         | -0.131                | 0.072        |
| 9) 140495645 C/G                    | -0.007                                  | -0.036       | 0.021        | 0.107                         | -0.037                | 0.242        | 0.038          | -0.048                | 0.131        |
| 10) 140495542 A/T                   | -0.005                                  | -0.096       | 0.087        | 0.056                         | -0.386                | 0.526        | 0.126          | -0.117                | 0.387        |
| 11) 140495303 C/T                   | 0.004                                   | -0.028       | 0.034        | -0.064                        | -0.21                 | 0.084        | 0.06           | -0.035                | 0.157        |
| 12) 140495244 G/A                   | -0.005                                  | -0.052       | 0.037        | -0.176                        | -0.381                | 0.04         | 0.044          | -0.104                | 0.17         |
| 13) 140495203 T/G                   | -0.001                                  | -0.033       | 0.03         | -0.076                        | -0.229                | 0.072        | 0.068          | -0.027                | 0.154        |
|                                     | $\beta$                                 | Lower 95% CI | Upper 95% CI | $\beta$                       | Lower 95% CI          | Upper 95% CI |                |                       |              |
| <b>OXT CSF vs Behavior</b>          | -0.024                                  | -0.080       | 0.032        | -0.273                        | -0.543                | 0.006        | -              | -                     | -            |

201

## 202 **SNP associations**

203 All 13 markers investigated (Fig 1) conformed to Hardy-Weinberg equilibrium, except  
 204 two (SNPs 1 and 9, Table 3). No significant associations were detected between individual  
 205 markers and behavioral outcomes or OXT CSF in our sample, as all uncorrected 95% credible  
 206 intervals overlapped zero (Table 2). When all markers were included in the model, no significant

207 improvement in model fit was observed, indicating that the cumulative effect of all SNPs still  
208 results in negligible effects on the investigated traits.

209

210 **Table 3. OXTR SNP Characteristics**

|    | SNP                | Hardy-Weinberg ( $\chi^2$ ) | p          | Minor Allele Frequency |
|----|--------------------|-----------------------------|------------|------------------------|
| 1  | chr3:140481032 G/A | 80.365                      | <0.001 *** | 0.204                  |
| 2  | chr3:140497572 G/C | 0.001                       | 0.981      | 0.315                  |
| 3  | chr3:140497358 G/A | 0.132                       | 0.716      | 0.314                  |
| 4  | chr3:140497003 G/T | 0.150                       | 0.698      | 0.026                  |
| 5  | chr3:140496605 T/C | 0.494                       | 0.482      | 0.462                  |
| 6  | chr3:140496348 A/G | 0.054                       | 0.817      | 0.479                  |
| 7  | chr3:140496344 A/C | 0.054                       | 0.817      | 0.479                  |
| 8  | chr3:140496196 G/T | 1.103                       | 0.294      | 0.265                  |
| 9  | chr3:140495645 C/G | 4.628                       | 0.031 *    | 0.430                  |
| 10 | chr3:140495542 A/T | 0.246                       | 0.620      | 0.033                  |
| 11 | chr3:140495303 C/T | 0.494                       | 0.482      | 0.462                  |
| 12 | chr3:140495244 G/A | 0.042                       | 0.837      | 0.143                  |
| 13 | chr3:140495203 T/G | 0.051                       | 0.821      | 0.448                  |

211 \*indicates significant deviation from Hardy-Weinberg equilibrium, as tested with a chi-square test

212

213

## 214 **Associations between OXT CSF and behavior**

215 Finally, the relationship between OXT CSF and pro-social and anxiety-like behavior  
216 yielded no significant effects (Table 2).

217

## 218 **Discussion**

219 Rhesus are a species with great translational value due to their behavioral and biological  
220 parallels to humans. Animals in this particular study also experienced complex social housing,  
221 and experimentally controlled environments (similar living, housing, and dietary conditions),  
222 attenuating the variability introduced by environmental factors that impact human studies. These

223 benefits might suggest that rhesus behavioral genetic studies, which aim to detect subtle  
224 genetic signals among various sources of environmental noise, are exempt from the large  
225 samples sizes necessary in analogous studies conducted in humans. However, the use of the  
226 rhesus model did not produce effects large enough to be detected in this sample. Specifically,  
227 we report no significant associations between the 13 *rhOXTR* SNPs on pro-social or anxiety-like  
228 behavior, or on OXT concentrations in CSF. Further, OXT CSF was not associated with any  
229 behavioral outcomes.

230

231         Although we did not find significant effects of individual markers, our heritability analysis  
232 showed moderate additive genetic effects on all investigated traits, underscoring the existence  
233 of substantial genetic influence on these outcomes. This is unsurprising given extensive  
234 research in humans demonstrating that most complex traits are on average 50% heritable [16].

235

236         Regarding SNP associations, explanations for our null results include: (1) Despite our  
237 informed strategy for selecting markers, it is possible we identified *rhOXTR* variants that do not  
238 affect expression (nor subsequent downstream normative behavior). This is a limitation of  
239 candidate-gene approach, which narrows the breadth of testable markers. Whole-genome  
240 association methods would be needed to comprehensively identify any and all robust markers  
241 (while acknowledging the non-trivial challenges to statistical power this introduces). Alternatively  
242 (2), the contributions of individual SNPs across the genome, including these 13, may have  
243 small, incremental effects on polygenic, complex traits that studies like this one are too  
244 underpowered to detect. Decades of research in humans indicates the latter is more plausible  
245 [17]. As such, the experimental control afforded by NHP studies such as this one is not sufficient  
246 to generate effects robust enough to override the necessity for large samples required in human  
247 studies.

248

249           Our results are consistent with [18], who also investigated *rhOXTR* markers and social  
250 behavior in a similarly-sized sample of rhesus and likewise found no significant effects. We  
251 agree with their conclusions that behavioral genetic studies in NHPs likely face the same  
252 challenges as in humans: First, samples upwards of tens of thousands would be required to be  
253 adequately powered. Second, reported associations with complex traits resulting from small  
254 genetic studies are more likely to be false-positives and fail to replicate, which has been well-  
255 documented in human literature.

256

257           While our approach to select influential *rhOXTR* markers was not effective for our  
258 specific behavioral outcomes in the context of this sample size, it could be suitable for  
259 identifying endophenotypes such as brain expression and neural activity, which bear a closer  
260 biological relationship to the proximate consequences of genetic variation. Future genetic  
261 associations studies of social behavior in NHPs should parallel the human genetics field in  
262 shifting to extensive collaborative efforts, resulting in the possibility of acquiring large sample  
263 sizes, surpassing what would be feasible for individual research groups. Importantly, our results  
264 do not negate the wealth of OXT research demonstrating OXT's role in regulating social  
265 behavior, nor do they refute the possibility that *OXTR* SNPs may have measurable effects in  
266 larger samples, or under different experimental conditions (e.g. stress challenges). Whole-  
267 genome approaches, when appropriate sample sizes can be attained, can address the relative  
268 influence of *OXTR* variants on shaping primate social behavior.

269

## 270 **Acknowledgments**

271

272 We like to thank Anne Glenn, Jennifer Miles, Geary Smith, Jeff Fisher, Jennifer Whitley, Amy  
273 Henry, Krystle Ainsworth, Colin White, and Sneka Raveendran for their technical support as well  
274 as the Yerkes NPRC Biomarkers Core for performing bioassays. We would also like to thank Dr.  
275 Jeffrey Rogers for his helpful insights with the experimental design of this study.  
276  
277

## 278 **References**

279

- 280 1. Feldman R, Monakhov M, Pratt M, Ebstein RP. Oxytocin pathway genes: evolutionary  
281 ancient system impacting on human affiliation, sociality, and psychopathology. *Biol*  
282 *Psychiatry*. 2016;79: 174–184. doi:10.1016/j.biopsych.2015.08.008
- 283 2. Walum H, Lichtenstein P, Neiderhiser JM, Reiss D, Ganiban JM, Spotts EL, et al.  
284 Variation in the oxytocin receptor gene is associated with pair-bonding and social  
285 behavior. *Biol Psychiatry*. 2012;71: 419–426. doi:10.1016/j.biopsych.2011.09.002
- 286 3. Skuse DH, Lori A, Cubells JF, Lee I, Conneely KN, Puura K, et al. Common polymorphism  
287 in the oxytocin receptor gene (OXTR) is associated with human social recognition skills.  
288 *Proc Natl Acad Sci USA*. 2014;111: 1987–1992. doi:10.1073/pnas.1302985111
- 289 4. LoParo D, Waldman ID. The oxytocin receptor gene (OXTR) is associated with autism  
290 spectrum disorder: a meta-analysis. *Mol Psychiatry*. 2015;20: 640–646.  
291 doi:10.1038/mp.2014.77
- 292 5. Bakermans-Kranenburg MJ, van Ijzendoorn MH. A sociability gene? Meta-analysis of  
293 oxytocin receptor genotype effects in humans. *Psychiatr Genet*. 2014;24: 45–51.  
294 doi:10.1097/YPG.0b013e3283643684
- 295 6. Tops S, Habel U, Radke S. Genetic and epigenetic regulatory mechanisms of the oxytocin  
296 receptor gene (OXTR) and the (clinical) implications for social behavior. *Horm Behav*.  
297 2018;108: 84–93. doi:10.1016/j.yhbeh.2018.03.002
- 298 7. Ioannidis JPA, Munafò MR, Fusar-Poli P, Nosek BA, David SP. Publication and other  
299 reporting biases in cognitive sciences: detection, prevalence, and prevention. *Trends*  
300 *Cogn Sci (Regul Ed)*. 2014;18: 235–241. doi:10.1016/j.tics.2014.02.010
- 301 8. King LB, Walum H, Inoue K, Eyrich NW, Young LJ. Variation in the Oxytocin Receptor

- 302 Gene Predicts Brain Region-Specific Expression and Social Attachment. *Biol Psychiatry*.  
303 2016;80: 160–169. doi:10.1016/j.biopsych.2015.12.008
- 304 9. Putnam PT, Young LJ, Gothard KM. Bridging the gap between rodents and humans: The  
305 role of non-human primates in oxytocin research. *Am J Primatol*. 2018;80: e22756.  
306 doi:10.1002/ajp.22756
- 307 10. Wilson ME, Bounar S, Godfrey J, Michopoulos V, Higgins M, Sanchez M. Social and  
308 emotional predictors of the tempo of puberty in female rhesus monkeys.  
309 *Psychoneuroendocrinology*. 2013;38: 67–83. doi:10.1016/j.psyneuen.2012.04.021
- 310 11. McCormack K, Newman TK, Higley JD, Maestriperi D, Sanchez MM. Serotonin  
311 transporter gene variation, infant abuse, and responsiveness to stress in rhesus macaque  
312 mothers and infants. *Horm Behav*. 2009;55: 538–547. doi:10.1016/j.yhbeh.2009.01.009
- 313 12. Schino G, Troisi A, Perretta G, Monaco V. Measuring anxiety in nonhuman primates:  
314 Effect of lorazepam on macaque scratching. *Pharmacology Biochemistry and Behavior*.  
315 1991;38: 889–891. doi:10.1016/0091-3057(91)90258-4
- 316 13. Chen J, Rozowsky J, Galeev TR, Harmanci A, Kitchen R, Bedford J, et al. A uniform  
317 survey of allele-specific binding and expression over 1000-Genomes-Project individuals.  
318 *Nat Commun*. 2016;7: 11101. doi:10.1038/ncomms11101
- 319 14. Hadfield JD. MCMC Methods for Multi-Response Generalized Linear Mixed Models:  
320 TheMCMCglmm R Package. *J Stat Softw*. 2010;33. doi:10.18637/jss.v033.i02
- 321 15. Chi PB, Duncan AE, Kramer PA, Minin VN. Heritability estimation of osteoarthritis in the  
322 pig-tailed macaque (*Macaca nemestrina*) with a look toward future data collection. *PeerJ*.  
323 2014;2: e373. doi:10.7717/peerj.373
- 324 16. Polderman TJC, Benyamin B, de Leeuw CA, Sullivan PF, van Bochoven A, Visscher PM,  
325 et al. Meta-analysis of the heritability of human traits based on fifty years of twin studies.  
326 *Nat Genet*. 2015;47: 702–709. doi:10.1038/ng.3285



- 327 17. Flint J, Munafò MR. Candidate and non-candidate genes in behavior genetics. *Curr Opin*  
328 *Neurobiol.* 2013;23: 57–61. doi:10.1016/j.conb.2012.07.005
- 329 18. Madlon-Kay S, Montague MJ, Brent LJJ, Ellis S, Zhong B, Snyder-Mackler N, et al. Weak  
330 effects of common genetic variation in oxytocin and vasopressin receptor genes on rhesus  
331 macaque social behavior. *Am J Primatol.* 2018;80: e22873. doi:10.1002/ajp.22873
- 332 19. Altmann SA. A field study of the sociobiology of rhesus monkeys, *Macaca mulatta*. *Ann N*  
333 *Y Acad Sci.* 1962;102: 338–435.

334

335

## 336 **Supporting information**

337 **Table S1. Assay and Primer information**

338

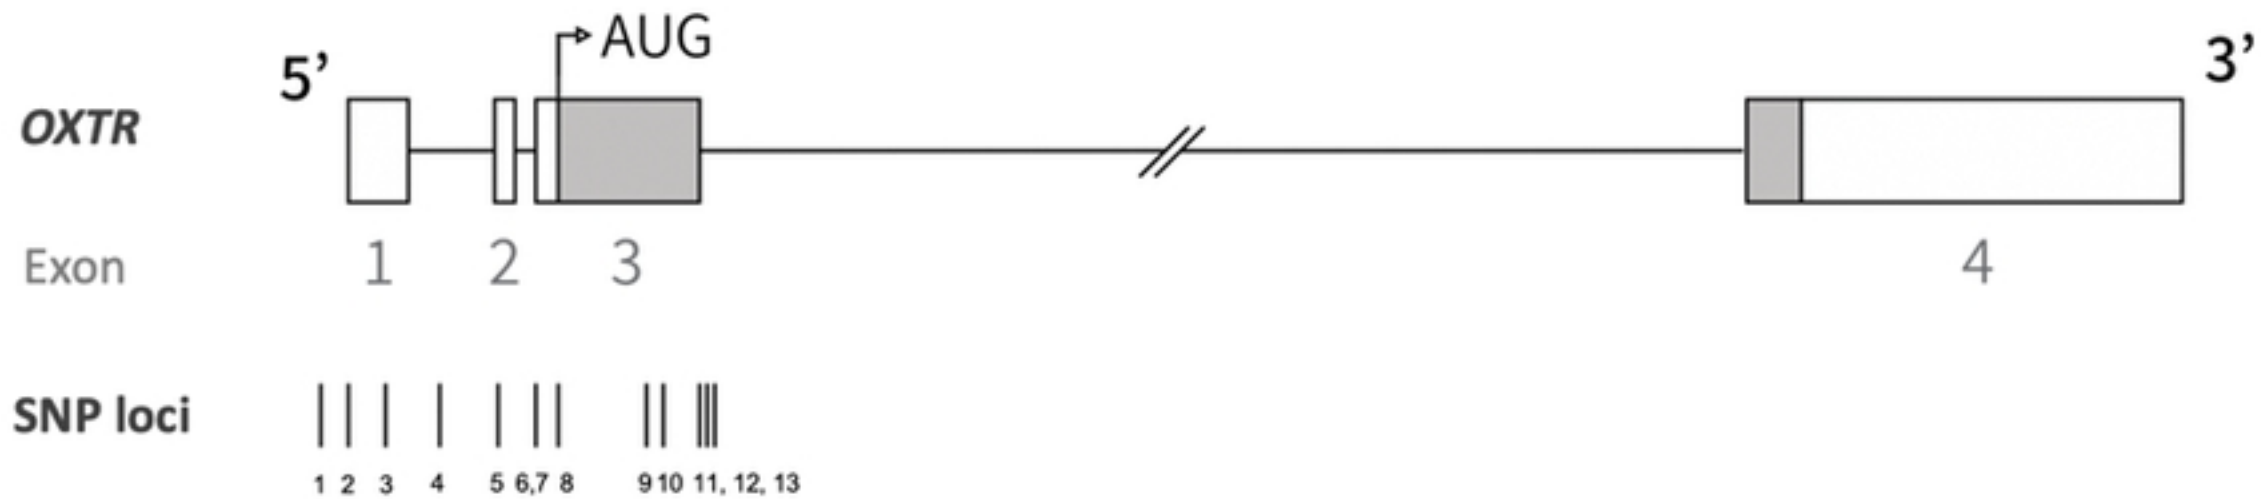

Fig1
